# Supplementary material
Source: Springer Nature journal article supplement (https://www.springermedizin.de/resource/supplementary/12931_2013_1406_MOESM3_ESM.pdf/9426192)

Difference vs placebo

0.13

-0.03

-0.08

-0.05

-0.19

-0.18

Week 13

Week 25

Mean change from baseline

0.0  
-0.5  
-1.0  
-1.5  
-2.0

- Placebo
- MEDI-528 30 mg
- MEDI-528 100 mg
- MEDI-528 300 mg

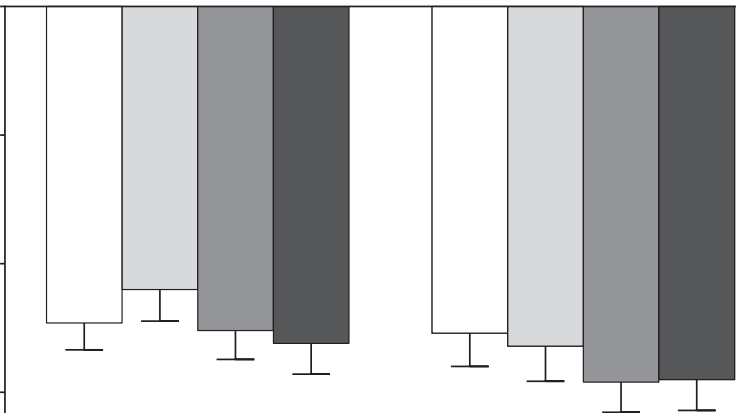

Supplement: MOESM3 [file 9426192]
